# Supplementary material
Source: Springer Nature journal article supplement (https://www.springermedizin.de/resource/supplementary/12957_2012_1310_MOESM4_ESM.pdf/9562282)

**A****Progression Free Survival**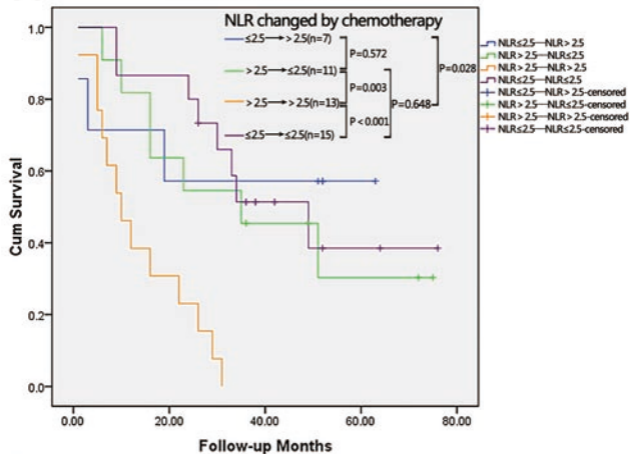**B****Overall Survival**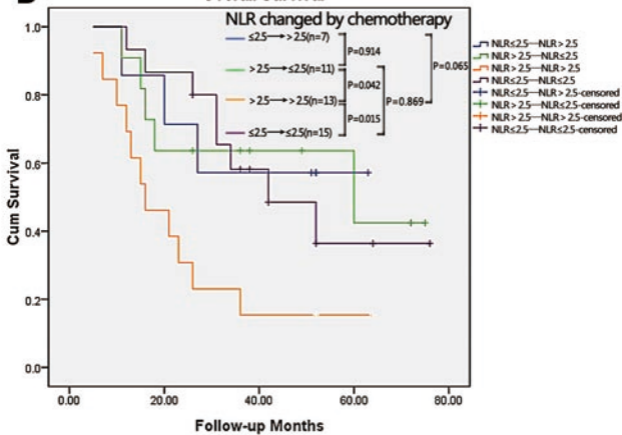

Supplement: MOESM4 [file 9562282]
